# Supplementary material
Source: publisher site journal article supplement (https://www.dovepress.com/article/supplementary_file/585639/Supplementary%20Material%20Revised.docx)
Supplement: Supplementary file 1 [file Supplementary%20Material%20Revised.docx]

## **Table S1** Additional clinical outcomes at baseline and 2 years in BT-treated severe asthma patients

| **Parameter** | **Responders (n = 22)** | **Non-responders (n = 8)** | ***P* value** |
| --- | --- | --- | --- |
| **ACQ5 scores** | | | |
| Baseline | 1.96±0.91 | 2.43±0.89 | 0.231 |
| 2 years | 0.53±0.30* | 2.42±1.17 | **<0.001** |
| Δ (2 years - baseline) | −1.43±0.80 | 0.00±0.44 | **<0.001** |
| **Acute exacerbations (per year)** | | | |
| Baseline | 4.20±3.74 | 8.38±10.27 | 0.607a |
| 2 years | 0.30±0.66* | 5.88±8.82 | **0.006**a |
| Δ (2 years - baseline) | −3.90±3.52 | −2.50±4.57 | 0.135a |

**Notes:** *P* values were calculated using the independent-samples t-test for normally distributed continuous variables. *P* values marked with superscript a were calculated using the Mann-Whitney U test for non-normally distributed variables, as assessed by the Shapiro-Wilk test. Data are presented as mean ± SD. **P* < 0.05 versus baseline within the same group, assessed by paired t-test or Wilcoxon signed-rank test, as appropriate. Data in boldface indicate statistical significance (*P* < 0.05). The symbol Δ represents longitudinal change, calculated as the 2-year value minus the baseline value.

**Abbreviations:** BT, bronchial thermoplasty; ACQ5, Asthma Control Questionnaire-5.

**Table S2** Longitudinal spirometric outcomes at baseline and 2 years in BT-treated severe asthma patients

| **Parameter** | **Responders (n = 20)** | **Non-responders (n = 8)** | ***P* value** |
| --- | --- | --- | --- |
| **Pre-bronchodilator FVC (L)** | | | |
| Baseline | 2.87±1.06 | 3.22±0.91 | 0.292 |
| 2 years | 3.04±1.10 | 2.95±1.31 | 0.485 |
| Δ (2 years - baseline) | +0.17±0.61 | −0.27±0.77 | 0.292 |
| **Pre-bronchodilator FEV1 (L)** | | | |
| Baseline | 1.85±0.95 | 2.25±0.72 | 0.116 |
| 2 years | 1.98±0.94 | 1.85±0.88 | 0.209 |
| Δ (2 years - baseline) | +0.13±0.27 | −0.40±0.68 | 0.116 |
| **Pre-bronchodilator FEV1 (% predicted)** | | | |
| Baseline | 66.76±22.16 | 71.27±14.08 | 0.121 |
| 2 years | 73.08±23.53 | 62.87±21.09 | 0.324 |
| Δ (2 years - baseline) | +6.32±12.17 | −8.40±18.81 | 0.121 |
| **Pre-bronchodilator FEV1/FVC (%)** | | | |
| Baseline | 64.47±11.23 | 70.01±13.45 | 0.296 |
| 2 years | 62.88±15.30 | 56.35±11.04 | 0.296 |
| Δ (2 years - baseline) | +0.71±11.78 | −9.40±12.19 | 0.117 |
| **Post-bronchodilator FEV1 (% predicted)** | | | |
| Baseline | 67.40 [52.05, 90.72] | 80.72±15.02 | 0.106a |
| 2 years | 75.30 [61.50, 94.67] | 67.16±16.49 | 0.098 |
| Δ (2 years - baseline) | +5.00 [1.73, 11.22] | −17.10 [−24.09, −3.04] | **0.046**a |
| **Post-bronchodilator FEV1/FVC (%)** | | | |
| Baseline | 67.31±10.45 | 71.22±12.33 | 0.469 |
| 2 years | 66.06±13.43 | 64.81±17.73 | 0.881 |
| Δ (2 years - baseline) | −1.28±11.25 | −6.72±15.82 | 0.469 |

**Notes:**  *P* values in the last column were calculated using Welch's t-test for normally distributed continuous variables. *P* values marked with superscript ᵃ were calculated using the Mann-Whitney U test for non-normally distributed variables, as assessed by the Shapiro-Wilk test. Data are presented as mean ± SD or median [interquartile range], according to the distribution of the within-patient change values for each parameter. For each parameter, baseline, 2-year, and Δ values were summarized using the same subset of patients with paired measurements available at both time points. Because of missing spirometric records at follow-up, the number of paired observations varied across parameters. Data in boldface indicate statistical significance (*P* < 0.05). The symbol Δ represents longitudinal change, calculated as the 2-year value minus the baseline value.

**Abbreviations:** BT, bronchial thermoplasty; FVC, forced vital capacity; FEV1, forced expiratory volume in 1 s.

## **Table S3** Detailed baseline demographic and clinical characteristics of severe asthmatic patients treated with BT

| **Parameter** | **Responders (n = 22)** | **Non-responders (n = 8)** | ***P* value** |
| --- | --- | --- | --- |
| **Demographic and clinical characteristics** | | | |
| Current or former smoker, n (%) | 4 (18) | 3 (38) | 0.345 |
| Allergic asthma, n (%) | 13 (59) | 7 (88) | 0.210 |
| Age of asthma onset (years), mean ± SD | 33.27±14.38 | 28.88±16.40 | 0.484 |
| Asthma phenotype, late/early onset (%) | 17/5 (77/23) | 7/1 (88/12) | 0.551 |
| Asthma duration (years), mean ± SD | 17.50±12.92 | 13.13±8.74 | 0.385 |
| **Laboratory findings** | | | |
| Neutrophil percentage (%) | 62.75±11.82 | 59.90±6.38 | 0.482 |
| Lymphocyte percentage (%) | 26.79±8.72 | 27.83±6.17 | 0.764 |
| Platelet count (×10⁹/L) | 213.32±56.99 | 224.13±55.46 | 0.653 |
| Serum CRP (mg/L) | 2.83±3.50 | 4.54±5.74 | 0.579 |
| Serum albumin (g/L) | 39.57±5.78 | 40.84±2.96 | 0.551 |
| Total cholesterol (mmol/L) | 4.89±0.98 | 5.17±0.72 | 0.472 |
| **BT activation number** | | | |
| Right lower lobe | 63.77±12.66 | 60.00±17.56 | 0.521 |
| Left lower lobe | 61.50±14.37 | 57.38±7.07 | 0.451 |
| Both upper lobes | 84.73±24.38 | 82.88±15.02 | 0.842 |
| Both lower lobes | 125.27±20.86 | 117.38±17.11 | 0.353 |

**Notes:** *P* values were calculated using the independent-samples t-test or the Mann-Whitney U test for continuous variables (based on data distribution assessed by the Shapiro-Wilk test), and the χ² test or Fisher’s exact test for categorical variables. Data are presented as mean ± SD or n (%).

**Abbreviations:** BT, bronchial thermoplasty; SD, standard deviation; CRP, C-reactive protein.

## **Table S4** Comparison of additional spirometry, IOS, and lung-volume parameters in BT-treated severe asthma patients

| **Parameter** | **Responders (n = 22)** | **Non-responders (n = 8)** | ***P* value** |
| --- | --- | --- | --- |
| **Spirometry parameters, mean ± SD** | | | |
| Post-bronchodilator FEV1 (L) | 2.09±0.89 | 2.64±0.64 | 0.063 |
| Post-bronchodilator FEV1 (% predicted) | 74.98±20.32 | 83.19±13.10 | 0.329 |
| Post-bronchodilator FEV1/FVC (% predicted) | 66.64±14.19 | 71.99±4.08 | 0.339 |
| Pre-MMEF (% predicted) | 34.01±26.37 | 38.48±18.42 | 0.386 |
| Post-MMEF (% predicted) | 40.04±27.43 | 45.10±12.84 | 0.212 |
| **IOS parameters, mean ± SD** | | | |
| Fres (Hz) | 16.99±7.30 | 10.66±4.41 | 0.082 |
| R5 (kPa/L/s) | 0.54±0.17 | 0.37±0.15 | 0.053 |
| R20 (kPa/L/s) | 0.40±0.11 | 0.32±0.12 | 0.157 |
| R5-R20 (kPa/L/s) | 0.12±0.07 | 0.05±0.04 | 0.312 |
| AX (kPa/L) | 1.10±0.96 | 1.22±0.26 | 0.614 |
| **Lung-volume parameters, mean ± SD** | | | |
| FRC (L) | 3.60±0.97 | 3.16±0.83 | 0.312 |
| TLC (L) | 5.47±1.15 | 5.96±1.40 | 0.383 |

**Notes:** *P* values were calculated using independent-samples t-test for normally distributed continuous variables and Mann-Whitney U test for non-normally distributed variables (assessed by Shapiro-Wilk test). Data are presented as mean ± SD.

**Abbreviations:** IOS, impulse oscillometry; BT, bronchial thermoplasty; FEV1, forced expiratory volume in 1 s; FVC, forced vital capacity; MMEF, maximal mid-expiratory flow; Fres, resonant frequency; R5, airway resistance at 5 Hz; R20, airway resistance at 20 Hz; R5–R20, difference in airway resistance between 5 and 20 Hz; AX, area of reactance; FRC, functional residual capacity; TLC, total lung capacity.

## **Table S5** Diagnostic performance of clinical, structural, and functional parameters for predicting BT response

| **Parameter** | **AUC (95% CI)** | **Cut-off value** | **Sensitivity** | **Specificity** | **Youden Index** |
| --- | --- | --- | --- | --- | --- |
| Weight (kg) | 0.759 (0.500-0.975) | 72.0 | 0.955 | 0.625 | 0.580 |
| Triglycerides (mmol/L) | 0.694 (0.451-0.925) | 1.10 | 0.556 | 0.833 | 0.389 |
| COL3 (IOD/mm2) | 0.846 (0.577-1.000) | 0.305 | 0.615 | 1.000 | 0.615 |
| Ai7-9 (mm2) | 0.830 (0.642-0.962) | 2.77 | 0.682 | 1.000 | 0.682 |
| Aw%3-6 (%) | 0.761 (0.576-0.917) | 32.97 | 0.727 | 0.750 | 0.477 |
| RV/TLC (%) | 0.756 (0.531-0.938) | 39.56 | 0.765 | 0.714 | 0.479 |
| BMI (kg/m2) | 0.733 (0.495-0.950) | 26.81 | 0.909 | 0.625 | 0.534 |
| X5 (kPa/L/s) | 0.938 (0.799-1.000) | -0.130 | 0.750 | 1.000 | 0.750 |
| Ai3-6 (mm2) | 0.795 (0.608-0.950) | 6.50 | 0.818 | 0.750 | 0.568 |
| COMB (BMI + X5 + Ai3-6) | 0.988 (0.925-1.000) | 0.952 | 0.938 | 1.000 | 0.938 |

**Notes:** Cut-off values were determined by maximizing the Youden index (sensitivity + specificity − 1) from ROC analysis. For the combined model (COMB), the cut-off value represents the predicted probability threshold derived from the logistic regression model. Available-case analysis was used, and the sample size varied across predictors: Weight, BMI, and Ai variables (n = 30); triglycerides and RV/TLC (n = 24); X5 and COMB (n = 21); and COL3 (n = 17).

**Abbreviations:** BT, bronchial thermoplasty; AUC, area under the curve; CI, confidence interval; COL3, collagen type III; IOD, integrated optical density; Ai, airway internal (luminal) area; Aw%, airway wall area percentage; RV, residual volume; TLC, total lung capacity; BMI, body mass index; X5, reactance at 5 Hz; COMB, combined model.

## **Table S6** Multivariable logistic regression analysis for predicting BT response(n = 21)

| **Variable** | **Coefficient** | **SE** | ***P* value** | **OR** | **95% CI** |
| --- | --- | --- | --- | --- | --- |
| BMI (kg/m2) | -0.074 | 0.314 | 0.815 | 0.929 | 0.502 – 1.720 |
| X5 (kPa/L/s) | -42.706 | 34.513 | 0.216 | 2.84 × 10-19 | 1.19 × 10-48 – 6.77 × 1010 |
| Ai3-6 (mm2) | 0.673 | 0.605 | 0.266 | 1.960 | 0.599 – 6.414 |

**Notes:** The multivariable model used 21 complete cases (16 responders and 5 non-responders). Model performance metrics were as follows: apparent AUC = 0.988; LOOCV AUC = 0.750; AIC = 13.5; Pseudo R² = 0.763. The likelihood ratio test comparing the full model with the X5-only model yielded χ² = 4.53 and *P* = 0.104.

**Abbreviations:** SE, standard error; OR, odds ratio; CI, confidence interval; AUC, area under the curve; LOOCV, leave-one-out cross-validation; AIC, Akaike information criterion.


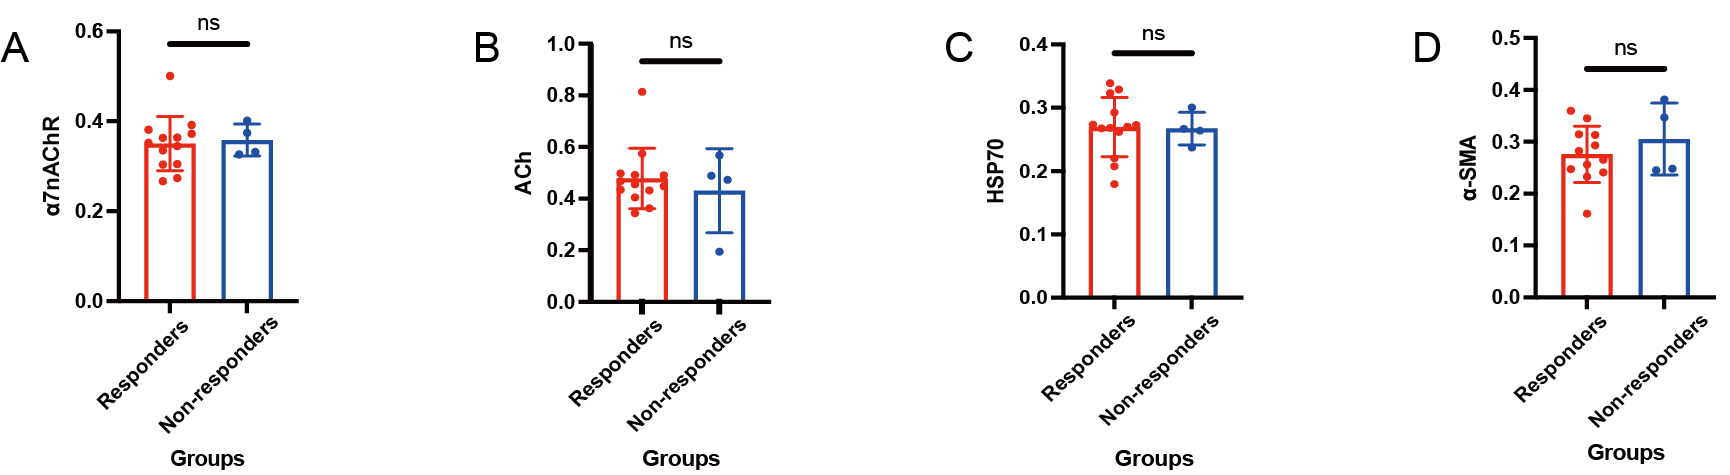


**Figure S1.** Quantitative analysis of additional airway mucosal immunohistochemical markers in responders and non-responders to bronchial thermoplasty (BT). (A) α7-nicotinic acetylcholine receptor (α7nAChR), (B) Acetylcholine (ACh), (C) Heat shock protein 70 (HSP70), (D) α-smooth muscle actin (α-SMA). Data are presented as mean ± SD. ns, not significant.
